# Supplementary material
Source: publisher figshare collection journal article supplement (https://diabetesjournals.figshare.com/articles/dataset/_/15124854)

Figure S1

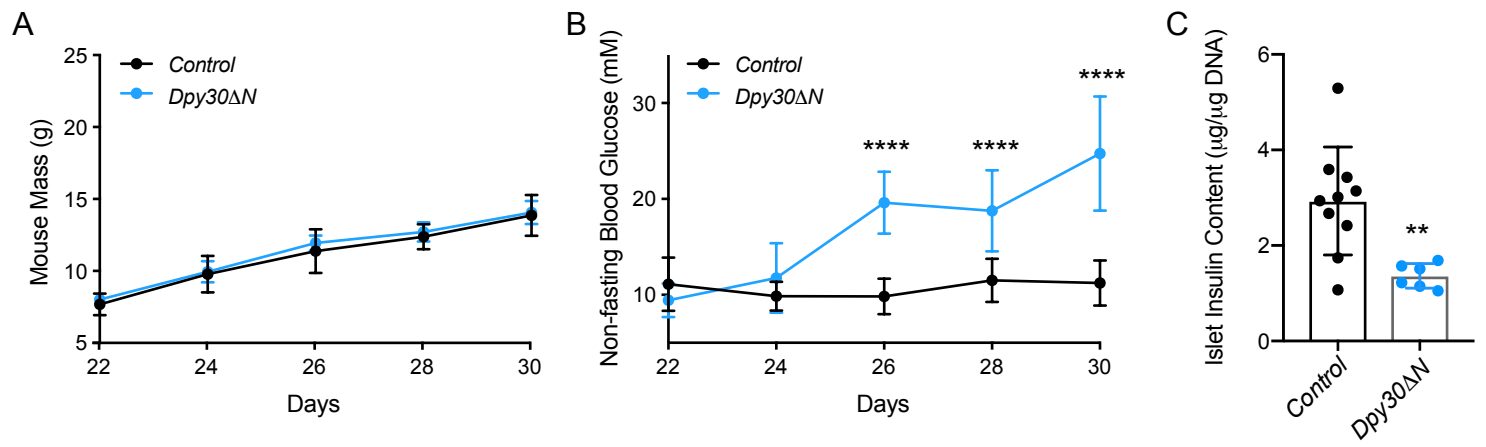

Supplement: Supplementary file 3 [file 1]

Figure S2

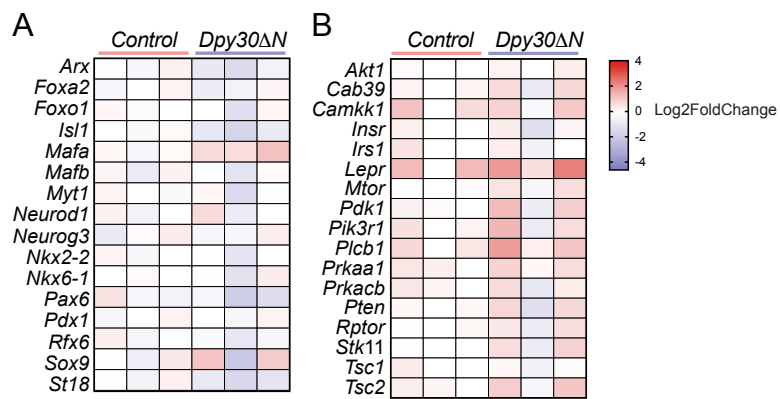

Supplement: Supplementary file 4 [file 1]
